# Supplementary material for: The Umbilical Cord Creatine Flux and Time Course of Human Milk Creatine across Lactation
Source: MDPI journal article supplement (doi:10.3390/nu16030345), 2024-01-24
Supplement: s1 [file s1]

**Table S1.** Human milk composition across a single breastfeeding session in one mother.

|           | Fat      | Proteine | Lactose  | Creatine | Creatinine |
|-----------|----------|----------|----------|----------|------------|
|           | g/100 ml | g/100 ml | g/100 ml | μmol/l   | μmol/l     |
| Sample 1  | 0.45     | 0.8      | 7.5      | 60.2     | 57.5       |
| Sample 2  | -        | -        | -        | 67.9     | 57.5       |
| Sample 3  | 1.5      | 0.8      | 7.4      | 66.3     | 61.1       |
| Sample 4  | 2.6      | 0.8      | 7.35     | 66.2     | 57.5       |
| Sample 5  | 2.8      | 0.75     | 7.5      | 67.9     | 57.5       |
| Sample 6  | 2.5      | 0.9      | 7.5      | 70.2     | 58.4       |
| Sample 7  | 3.55     | 0.7      | 7.6      | 68.6     | 57.8       |
| Sample 8  | 5.35     | 0.6      | 7.3      | 83.3     | 58.4       |
| Sample 9  | 5.5      | 0.7      | 7.4      | 97.3     | 61.1       |
| Sample 10 | -        | -        | -        | 91.6     | 62.8       |

**Table S2.** Breastmilk milk composition during the first six months of breastfeeding. Data is given as mean+/-SD.

|           | Protein       | Fat          | Carbohydrate | Creatine   | Creatinine |
|-----------|---------------|--------------|--------------|------------|------------|
|           | g/100ml       | g/100ml      | g/100ml      | μmol/l     | μmol/l     |
| Colostrum | 1,39 +/- 0,26 | 2,3 +/- 0,72 | 7,0 +/- 0,76 | 120 +/- 36 | 33 +/- 10  |
| Week 2    | 1,01 +/- 0,24 | 1,9 +/- 0,76 | 7,0 +/- 0,50 | 89 +/- 23  | 40 +/- 5,0 |
| Week 3-4  | 0,90 +/- 0,19 | 1,9 +/- 0,73 | 7,3 +/- 0,19 | 82 +/- 25  | 41 +/- 8,9 |
| Month 2   | 0,76 +/- 0,15 | 2,3 +/- 0,92 | 7,4 +/- 0,69 | 79 +/- 20  | 43 +/- 5,6 |
| Month 3   | 0,72 +/- 0,08 | 1,7 +/- 0,89 | 7,1 +/- 0,23 | 87 +/- 30  | 39 +/- 4,6 |
| Month 4   | 0,74 +/- 0,18 | 1,9 +/- 1,02 | 7,1 +/- 0,20 | 86 +/- 23  | 40 +/- 8,2 |
| Month 6   | 0,65 +/- 0,14 | 1,9 +/- 1,24 | 7,1 +/- 0,26 | 72 +/- 31  | 39 +/- 6,9 |
